# Supplementary material for: A computational elucidation of the Structure-Property Relationships in Graphene-Organic 2D Crystal Heterostructures
Source: Research Square preprint supplement (doi:10.21203/rs.3.rs-8172814/v1), 2025-12-19
Supplement: Supplementary file 1 [file 33b52db7249cbcb467b4ab7d.pdf]

# A computational elucidation of the Structure-Property Relationships in Graphene-Organic 2D Crystal Heterostructures

Shuangjie Zhao<sup>1</sup>, Miroslav Položij<sup>1,2,3</sup>, Thomas Heine<sup>\*1,2,3,4</sup>

<sup>1</sup>Chair of Theoretical Chemistry, Technische Universität Dresden, Bergstr. 66, 01069 Dresden, Germany

<sup>2</sup>Helmholtz-Zentrum Dresden-Rossendorf, HZDR, Bautzner Landstr. 400, 01328, Dresden, Germany

<sup>3</sup>Center for Advanced Systems Understanding, CASUS, Untermarkt 20, 02826 Görlitz, Germany

<sup>4</sup>Department of Chemistry and ibs for Nanomedicine, Yonsei University, Seodaemungu, Seoul 120-749, Republic of Korea

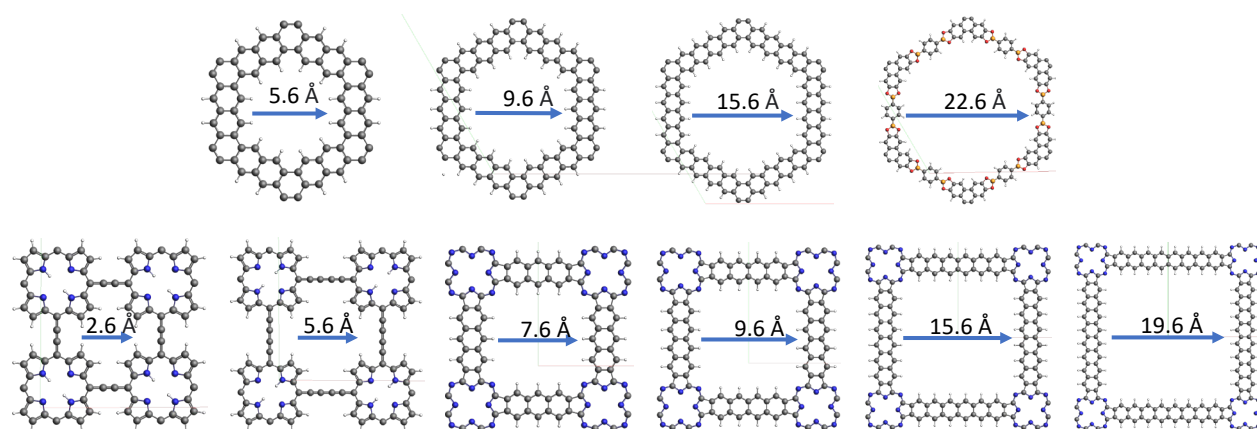

Figure S1. Ball-and-stick representations for structures of studied O2DCs (hcb: h1 to h4; sq: s1 to s6)

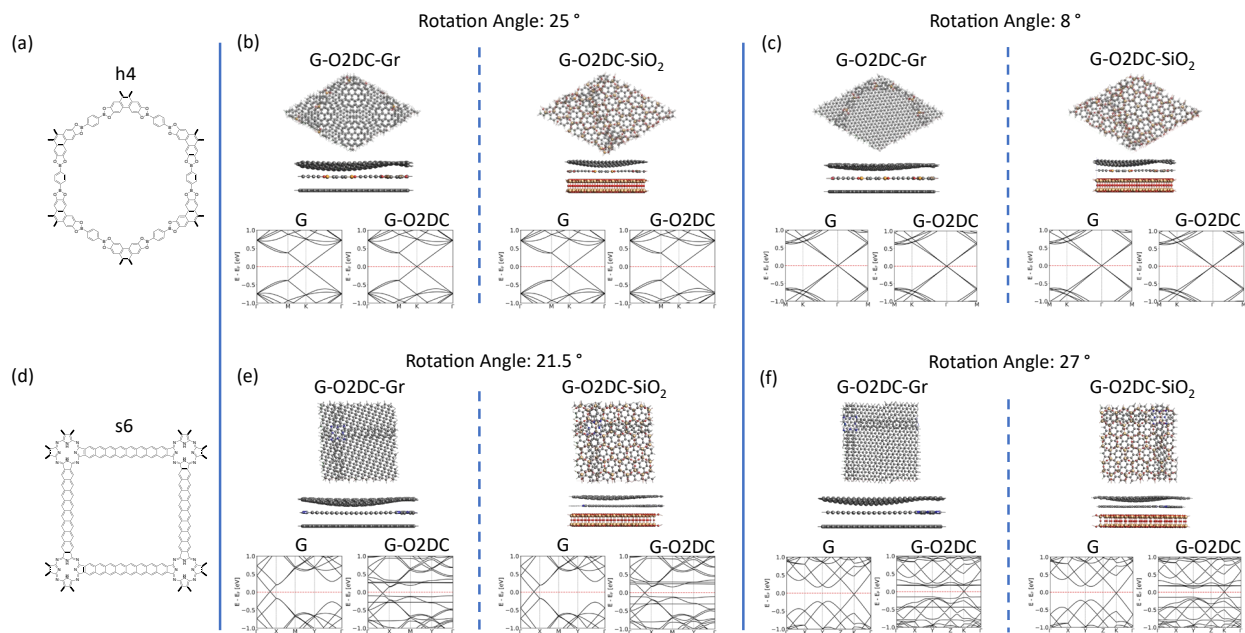

Figure S2. Band structures of G part only and G-O2DC part for G-O2DC-Gr and G-O2DC-SiO<sub>2</sub> structures of h4 (a) and s6 (d) with different rotational angle between G and O2DC layer. (25 ° and 8 ° for h4, 21.5 ° and 27 for s6).

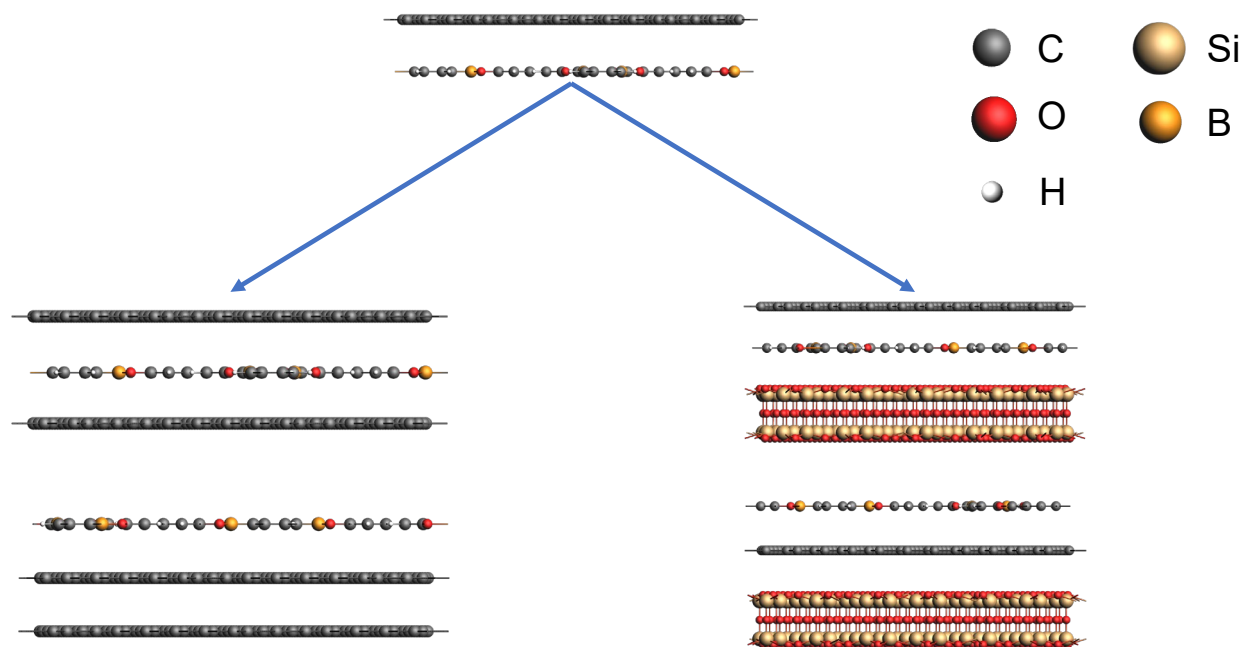

Figure S3. Ball-and-stick representation of investigated structures of  $h4^1$  as examples.

### Corrugation and Lattice Parameter Error Analysis

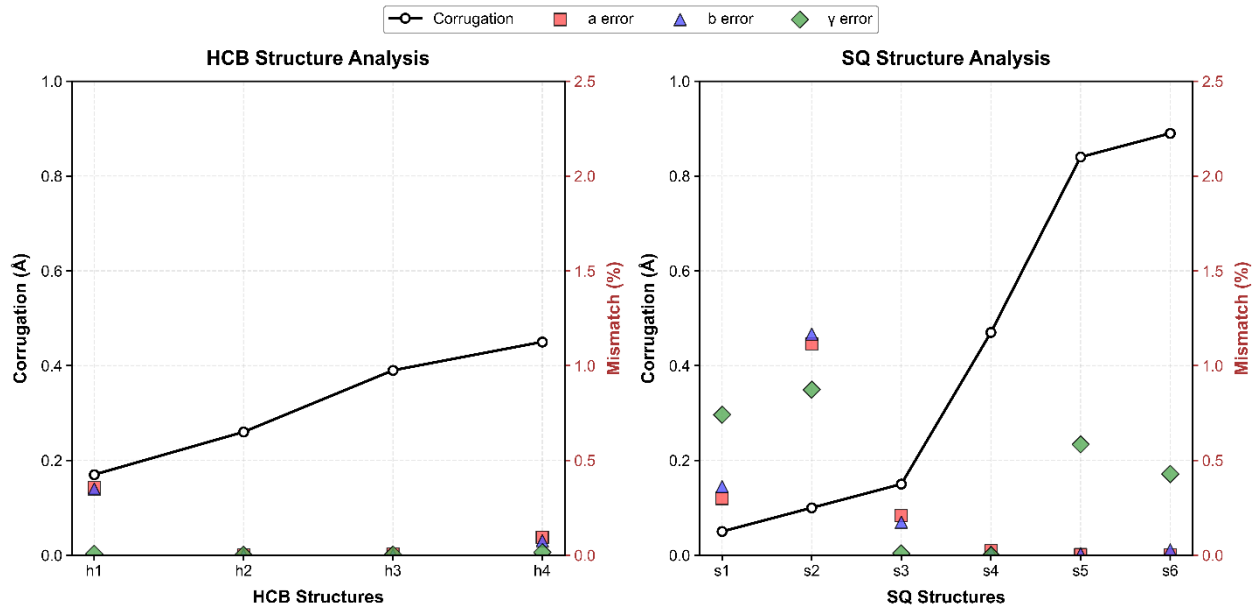

Figure S4. Analysis of lattice mismatch in built G-O2DC heterostructures (HCB: honeycomb; SQ: square). Lattice vector  $a$ ,  $b$  and angle  $\gamma$  were compared between O2DCs alone and after being incorporated into heterostructures.

### Corrugation and Lattice Parameter Error Analysis

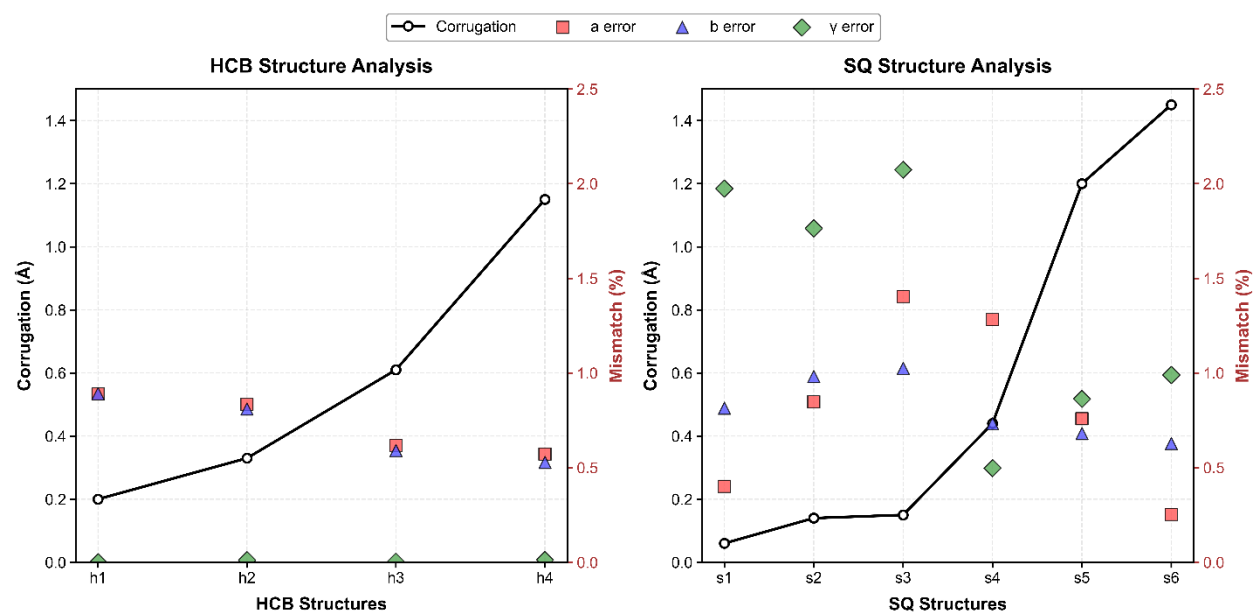

Figure S5. Corrugation in built G-O2DC-SiO<sub>2</sub> heterostructures (HCB: honeycomb; SQ: square) along with analysis of lattice mismatch.

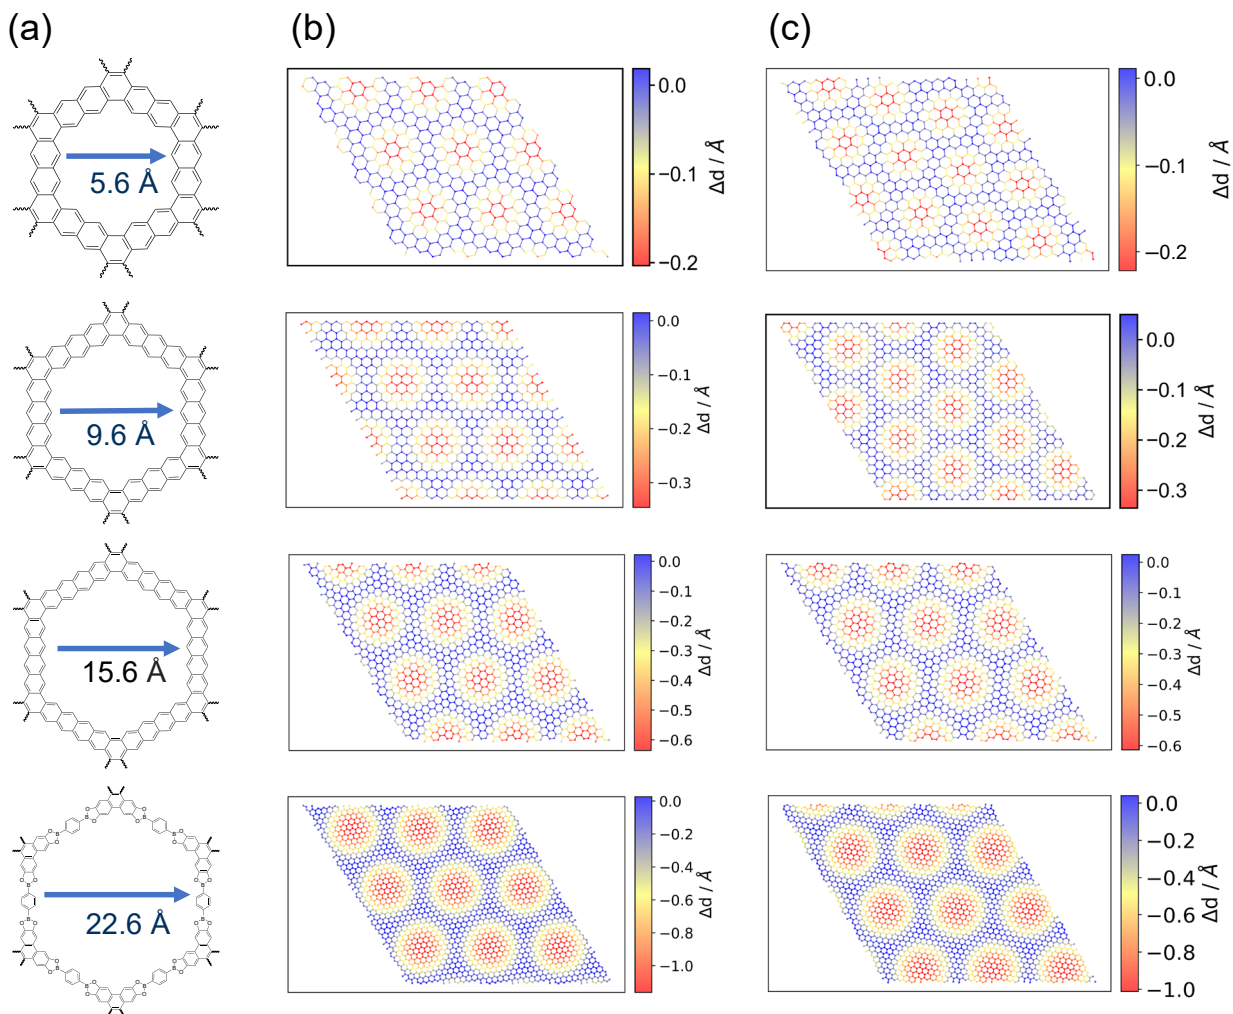

Figure S6. Full-spectrum deformation analysis of corrugation on graphene for G-O2DC-Gr (column b) and G-O2DC-SiO<sub>2</sub> (column c) structures for O2DC model h1 to h4. The rotational angles (RA) between G and O2DC are 18.9°, 0.0°, 23.0°, 8.0°, respectively.

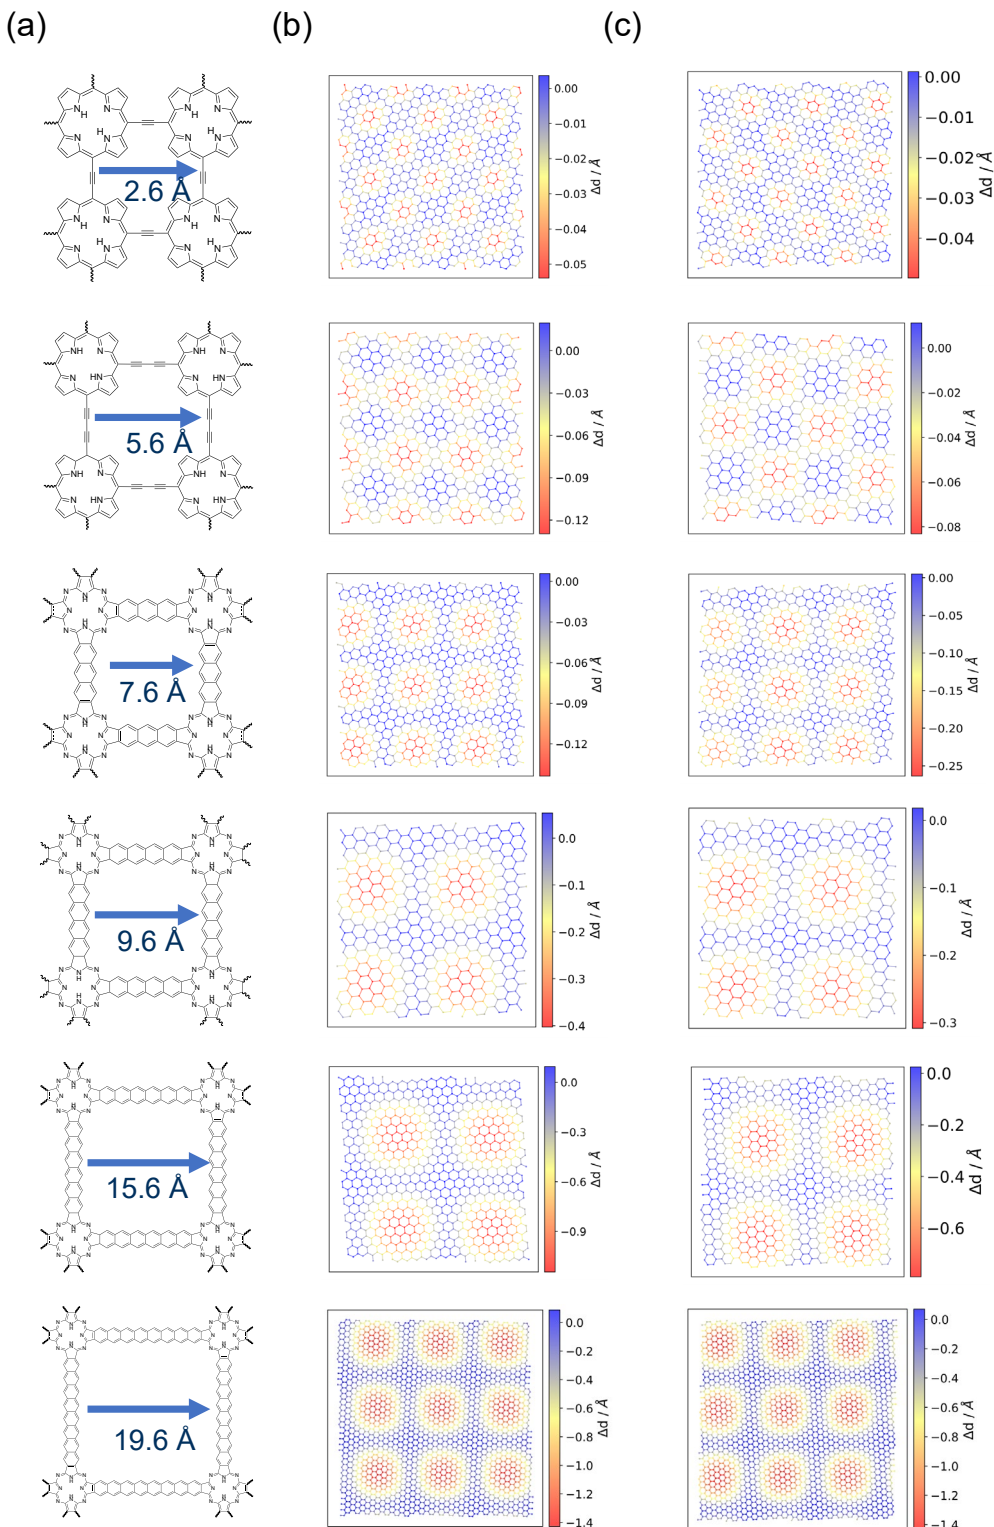

Figure S7. Full-spectrum deformation analysis of corrugation on graphene for G-O2DC-Gr (column b) and G-O2DC-SiO<sub>2</sub> (column c) structures for O2DC model s1 to s6. The rotational angles (RA) between G and O2DC are 0.0°, 9.9°, 13.8°, 5.5°, 34.2°, 27.0°, respectively.



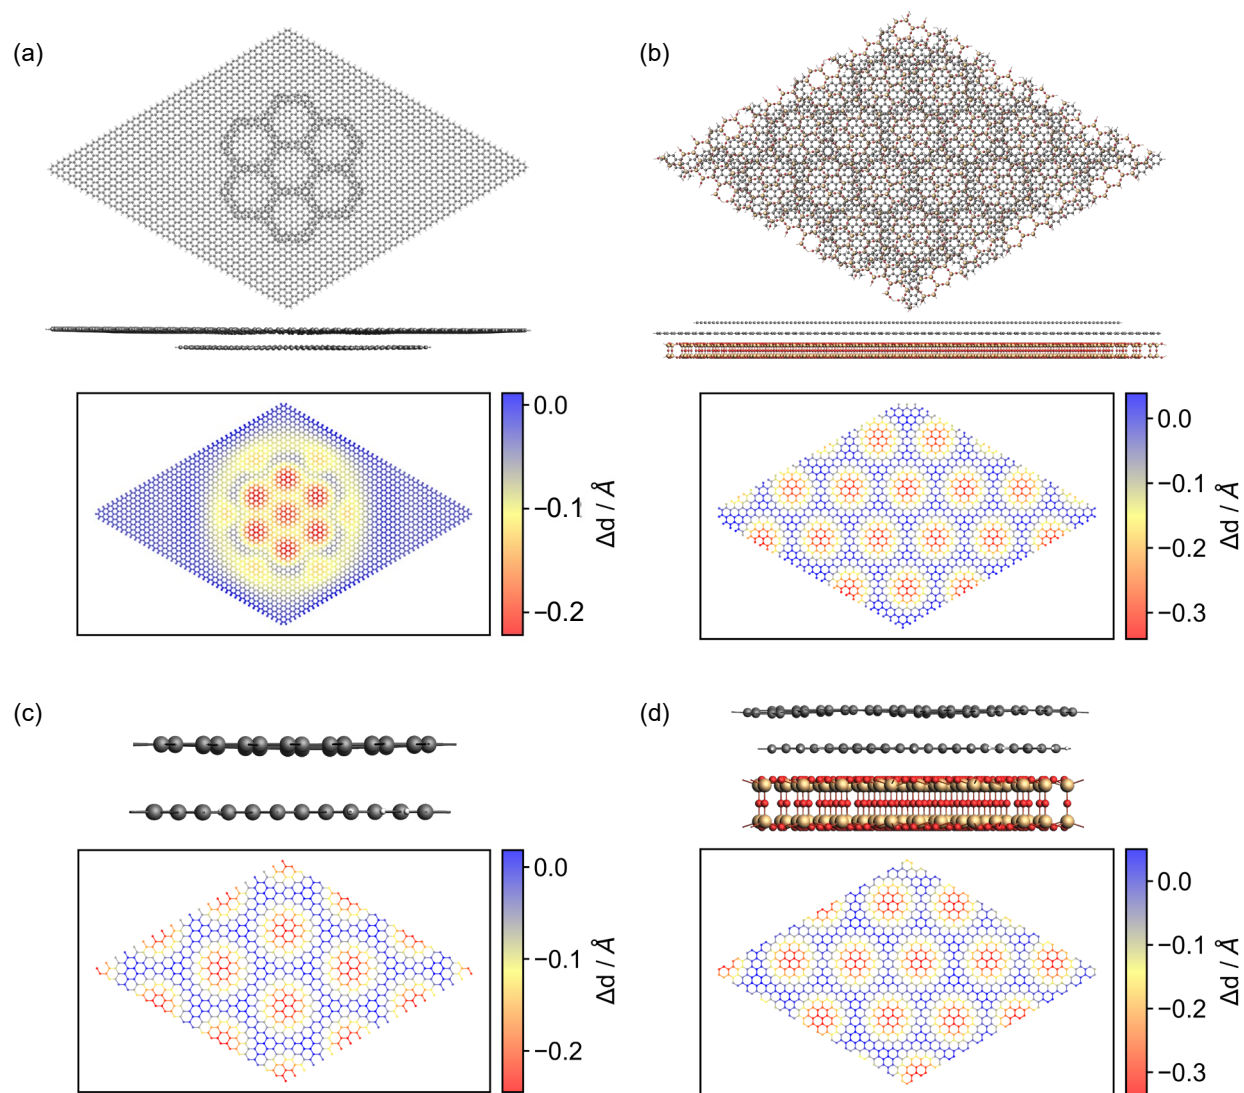

Figure S8. Test strategy and results of deformation analysis for strain in built non-periodic G-O2DC(h2) (a) and graphene flake on periodic O2DC(h2)-substrate (b, here substrate is SiO<sub>2</sub>), and the comparison with the studied periodic G-O2DC(h2) structure (c) and G-O2DC(h2)-SiO<sub>2</sub> structure (d).



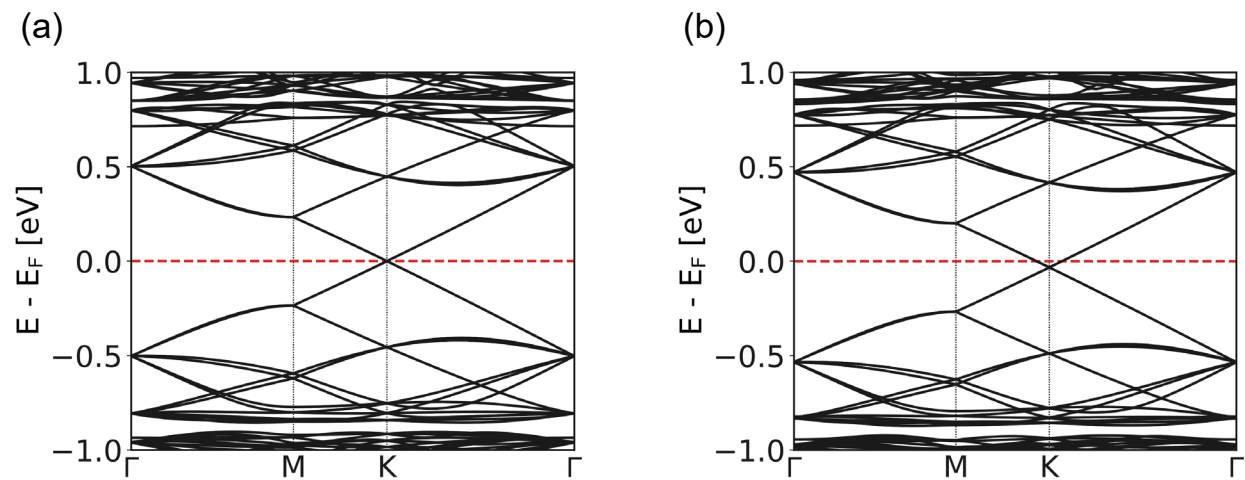

Figure S9. Band structures of G-O2DC(h1)-SiO<sub>2</sub> when SiO<sub>2</sub> was not (a) and was (b) included during only the band structure calculation.

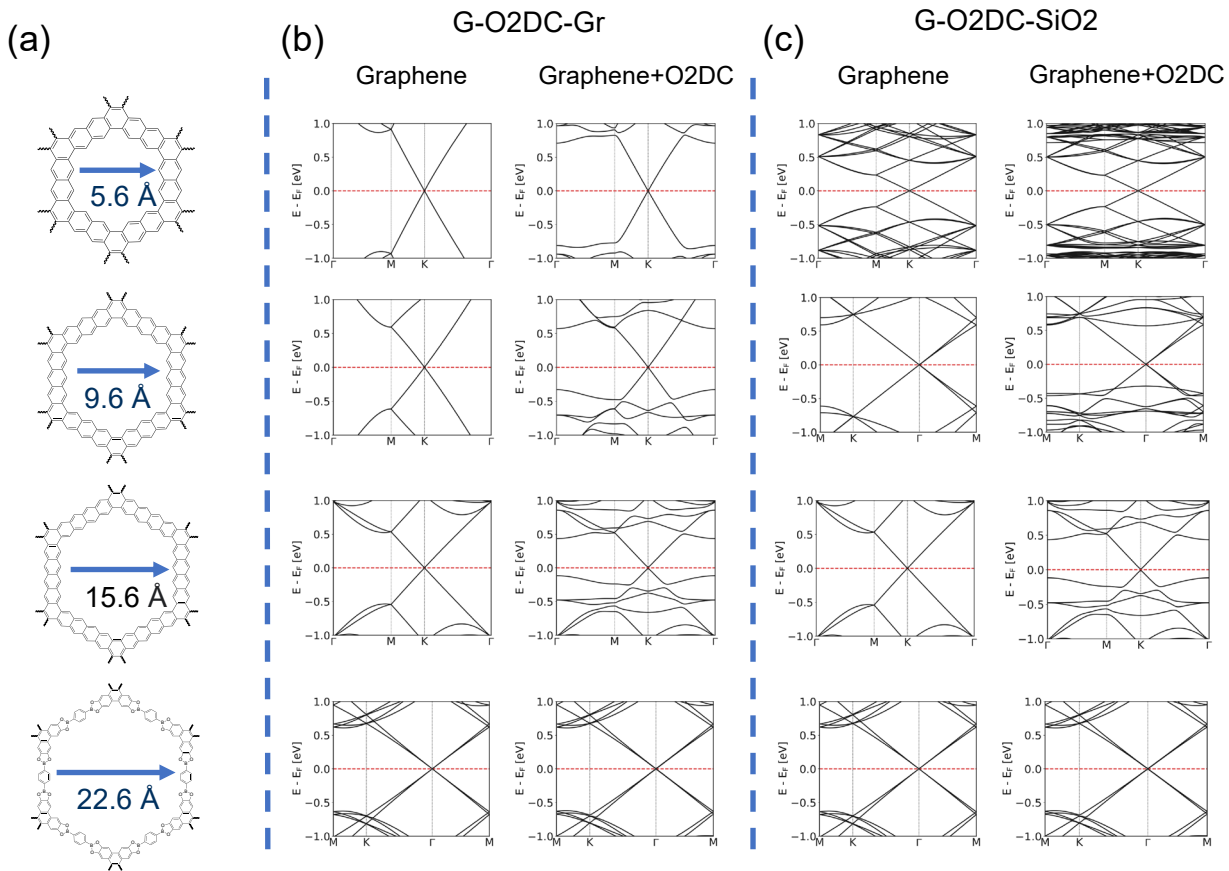

Figure S10. Band structures of sole graphene and graphene + O2DC moiety in G-O2DC-substrates (Gr and SiO<sub>2</sub>) structures for h1 to h4.

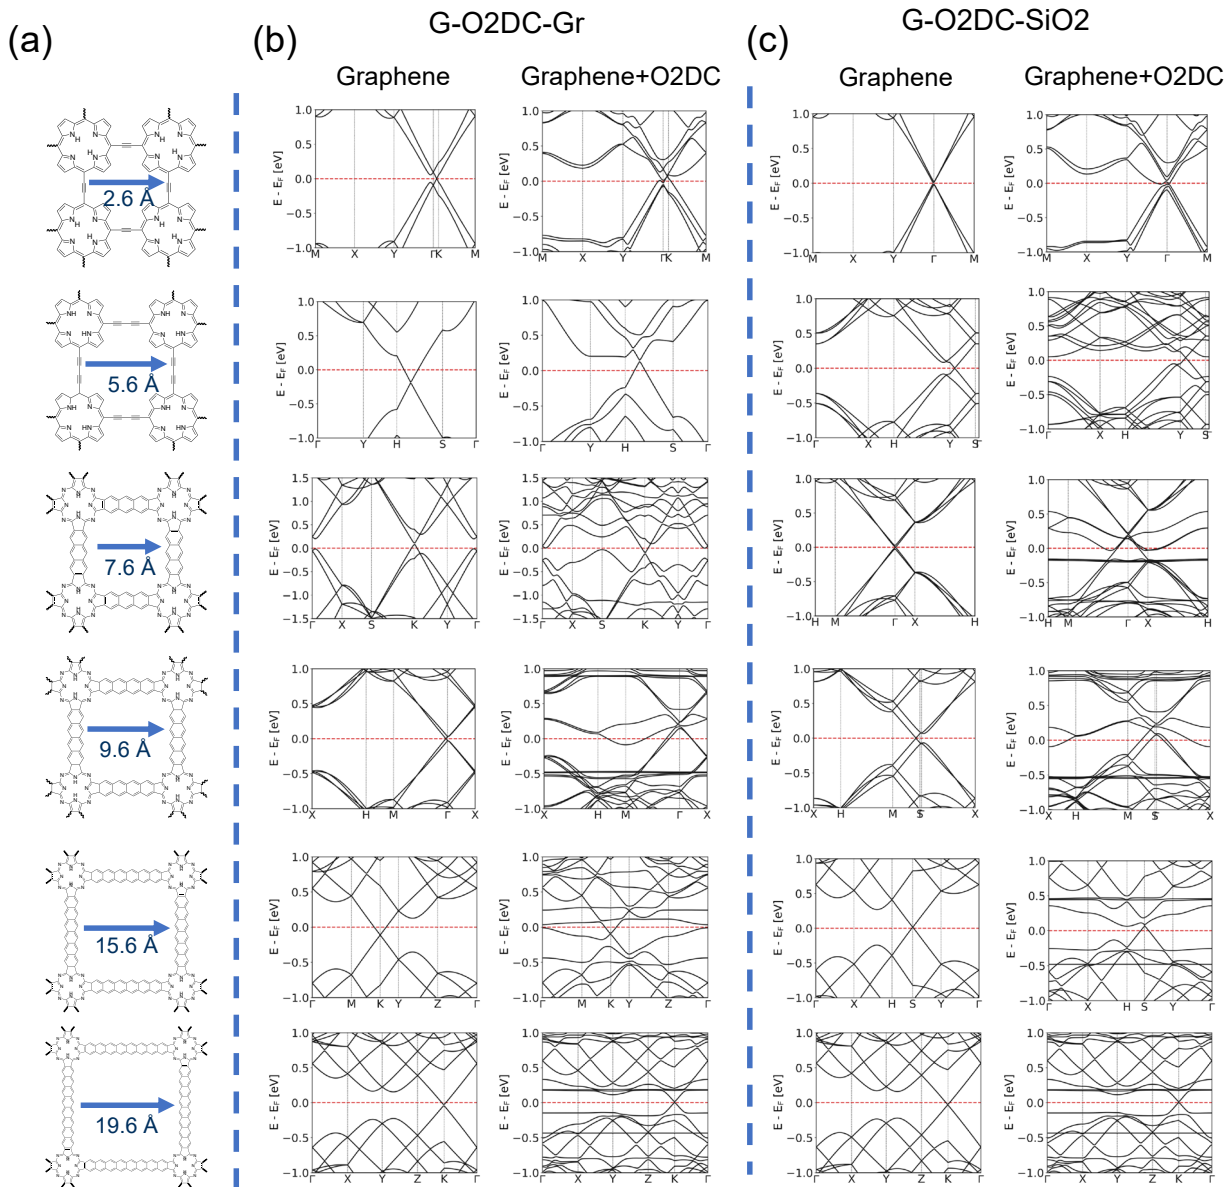

Figure S11. Band structures of sole graphene and graphene + O2DC moiety in G-O2DC-substrates (Gr and SiO<sub>2</sub>) structures for studied O2DCs with square lattice.

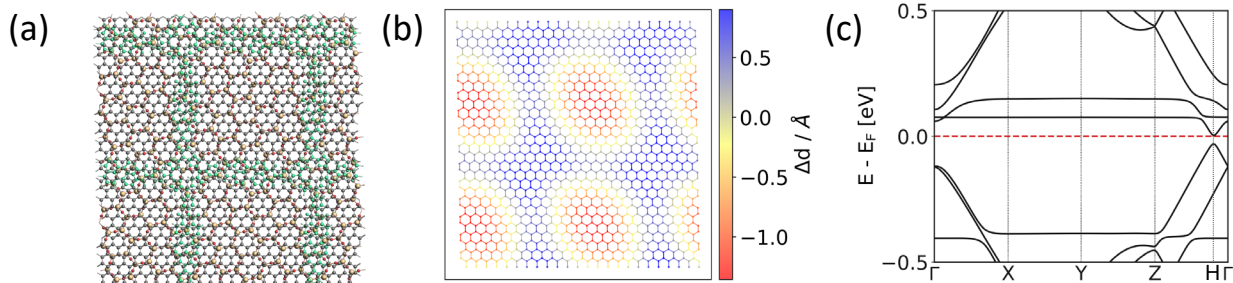

Figure S12. Example of influence of artificial strain on corrugation of graphene and its band structure. (a) G-O2DC-SiO<sub>2</sub> structure from a 2D rectangular polyimide O2DC. (b) Deformation analysis of graphene layer. (c) Band structure of G-O2DC moiety. Distortion that does not align with the shape of the pore from used O2DC can be seen clearly from (b), and a band gap is opened artificially.

Table S1. Band gap (meV) of studied configurations of **h1** to **h4** with substrates Gr/SiO<sub>2</sub>. The rotational angles between graphene and O2DC are shown.

|                         | h1 (18.9°) | h2 (0.0°) | h3 (23.0°) | h4 (25.1°) | h4 (8.0°) |
|-------------------------|------------|-----------|------------|------------|-----------|
| G-O2DC-Gr               | 1.8        | 3.6       | 2.1        | 4.4        | 2.6       |
| G-O2DC-SiO <sub>2</sub> | 0.8        | 5.6       | 1.8        | 8.6        | 2.0       |

Table S2. Band gap (meV) of studied configurations of **s1** to **s6** with substrates Gr/SiO<sub>2</sub>. The rotational angles between graphene and O2DC are shown.

|                         | s1 (0.0°) | s2 (9.9°) | s3 (13.8°) | s4 (5.5°) | s5 (34.2°) | s6 (27.0°) | s6 (21.5°) |
|-------------------------|-----------|-----------|------------|-----------|------------|------------|------------|
| G-O2DC-Gr               | 2.9       | 1.5       | 1.4        | 6.0       | 4.1        | 12.1       | 12.1       |
| G-O2DC-SiO <sub>2</sub> | 5.2       | 3.0       | 1.0        | 3.5       | 6.6        | 11.4       | 8.2        |
